# Supplementary material for: The role of subjective significance, valence and arousal in the explicit processing of emotion-laden words
Source: PeerJ. 2023 Jan 6;11:e14583. doi: 10.7717/peerj.14583 (PMC9828281; doi:10.7717/peerj.14583)
Supplement: Supplemental Information 2 — The exact statistics (descriptive and inferential) for main effects, two- and three-way interactions for the P300 component; N400 component; LPC component; reaction times; frequency of emotional decision. [file peerj-11-14583-s002.xlsx]

## Sheet: P300
							Bars show mean for a given combination of the factors, error bars mark SEM, dots represent values of individual subjects. Horizontal lines indicate significantly different pairs of conditions. (* p<.05, ** p<.01, ***p<.001)			Interaction between Valence:Subjective Significance	F(4, 180) = 3.14, p = .016, η^2_p = 0.07
	Subjective Significance	M	SEM	MIN	MAX				Negative	Effect of Subjective Significance	F(2, 90) = 26.17, p < .001, η^2_p = 0.37
	Low Subjective Significance	0.67	0.45	-5.73	7.75					Low Subjective Significance < High Subjective Significance	t(45) = -7.59, p < .001, d = -2.26
	Medium Subjective Significance	1.17	0.46	-4.95	10.22					Medium Subjective Significance < High Subjective Significance	t(45) = -2.27, p = .028, d = -0.68
	High Subjective Significance	1.55	0.45	-4.95	7.42					Medium Subjective Significance > Low Subjective Significance	t(45) = 4.73, p < .001, d = 1.41
									Neutral	Effect of Subjective Significance	F(2, 90) = 12.31, p < .001, η^2_p = 0.21
										Low Subjective Significance < High Subjective Significance	t(45) = -4.79, p < .001, d = -1.43
										Medium Subjective Significance > Low Subjective Significance	t(45) = 2.97, p = .010, d = 0.88
	Valence : Subjective Significance	M	SEM	MIN	MAX				Positive	Effect of Subjective Significance	F(2, 90) = 3.33, p = .040, η^2_p = 0.07
Negative	Low Subjective Significance	0.49	0.42	-4.98	7.6					Low Subjective Significance < High Subjective Significance	t(45) = -2.59, p = .039, d = -0.77
	Medium Subjective Significance	1.29	0.48	-4.63	10.71
	High Subjective Significance	1.7	0.44	-5.47	8.14		Three-way interaction between Valence:Arousal:Subjective Significance
Neutral	Low Subjective Significance	0.66	0.49	-7.44	7.67					Three-way interaction between Valence:Arousal:Subjective Significance	F(8, 360) = 4.28, p < .001, η^2_p = 0.09
	Medium Subjective Significance	1.29	0.45	-4.9	8.67				Positive	Interaction between Arousal:Subjective Significance	F(4, 180) = 4.21, p = .003, η^2_p = 0.09
	High Subjective Significance	1.66	0.49	-4.76	8.23					High Arousal:Low Subjective Significance < High Arousal:High Subjective Significance	t(45) = -3.61, p = .027, d = -1.08
Positive	Low Subjective Significance	0.86	0.47	-5.13	7.98					Medium Arousal:Medium Subjective Significance < Medium Arousal:High Subjective Significance	t(45) = -3.50, p = .037, d = -1.04
	Medium Subjective Significance	0.93	0.47	-7.27	11.29				Low Arousal	Interaction between Valence:Subjective Significance	F(4, 180) = 5.78, p < .001, η^2_p = 0.11
	High Subjective Significance	1.29	0.46	-6.29	6.26					Negative:Low Subjective Significance < Negative:High Subjective Significance	t(45) = -5.26, p < .001, d = -1.57
										Negative:Medium Subjective Significance > Negative:Low Subjective Significance	t(45) = 3.59, p = .027, d = 1.07
										Neutral:Low Subjective Significance < Neutral:High Subjective Significance	t(45) = -4.02, p = .007, d = -1.20
	Arousal: Valence : Subjective Significance	M	SEM	MIN	MAX					Positive:High Subjective Significance < Neutral:High Subjective Significance	t(45) = -3.46, p = .037, d = -1.03
Low Arousal	Negative : Low Subjective Significance	0.33	0.43	-6.95	6.43				Medium Arousal	Interaction between Valence:Subjective Significance	F(4, 180) = 3.52, p = .009, η^2_p = 0.07
	Neutral : Low Subjective Significance	0.53	0.51	-8.13	7.64					Negative:Low Subjective Significance < Negative:High Subjective Significance	t(45) = -5.40, p < .001, d = -1.61
	Positive : Low Subjective Significance	1.17	0.54	-6.53	11.31					Negative:Medium Subjective Significance > Negative:Low Subjective Significance	t(45) = 4.11, p = .006, d = 1.22
	Negative : Medium Subjective Significance	1.39	0.55	-6.49	11.29					Positive:Medium Subjective Significance < Negative:Medium Subjective Significance	t(45) = -4.08, p = .006, d = -1.22
	Neutral : Medium Subjective Significance	1.15	0.45	-6.03	8.09
	Positive : Medium Subjective Significance	1.21	0.56	-8.11	16.65
	Negative : High Subjective Significance	1.76	0.44	-4.02	7.56
	Neutral : High Subjective Significance	1.79	0.47	-4.51	8.79
	Positive : High Subjective Significance	0.79	0.49	-6.97	6.22
Medium Arousal	Negative : Low Subjective Significance	0.32	0.44	-5.86	7.82
	Neutral : Low Subjective Significance	0.76	0.53	-7.84	8.95
	Positive : Low Subjective Significance	0.79	0.48	-6.67	7.9
	Negative : Medium Subjective Significance	1.6	0.52	-5.25	11.59
	Neutral : Medium Subjective Significance	1.06	0.51	-7.92	9.25
	Positive : Medium Subjective Significance	0.58	0.42	-4.34	8.08
	Negative : High Subjective Significance	1.72	0.46	-6.57	9.03
	Neutral : High Subjective Significance	1.57	0.54	-6.2	8.43
	Positive : High Subjective Significance	1.53	0.48	-5.73	7.32		Interaction between Arousal:Subjective Significance at Positive
High Arousal	Negative : Low Subjective Significance	0.83	0.48	-5.80	9.71
	Neutral : Low Subjective Significance	0.69	0.49	-8.60	7.47
	Positive : Low Subjective Significance	0.63	0.47	-6.36	7.00
	Negative : Medium Subjective Significance	0.87	0.49	-5.91	9.25
	Neutral : Medium Subjective Significance	1.67	0.49	-4.33	8.68
	Positive : Medium Subjective Significance	1.01	0.52	-9.48	9.14
	Negative : High Subjective Significance	1.61	0.52	-6.28	10.73
	Neutral : High Subjective Significance	1.62	0.56	-7.18	10.79
	Positive : High Subjective Significance	1.54	0.48	-6.15	7.20
							Interaction between Valence:Subjective Significance at Low Arousal
							Interaction between Valence:Subjective Significance at Medium Arousal

## Sheet: N450
	Valence	M	SEM	MIN	MAX		Bars show mean for a given combination of the factors, error bars mark SEM, dots represent values of individual subjects. Horizontal lines indicate significantly different pairs of conditions. (* p<.05, ** p<.01, ***p<.001)			Interaction between Valence:Arousal	F(4, 180) = 2.98, p = .021, η^2_p = 0.06
	Negative	-1.38	0.41	-7.91	5.31				Neutral	Effect of Arousal	F(2, 90) = 5.44, p = .006, η^2_p = 0.11
	Neutral	-1.66	0.43	-8.97	3.71					Low Arousal < High Arousal	t(45) = -3.12, p = .009, d = -0.93
	Positive	-1.76	0.42	-8.35	5.3				Medium Arousal	Effect of Valence	F(2, 90) = 5.02, p = .009, η^2_p = 0.10
										Positive < Negative	t(45) = -3.64, p = .002, d = -1.08
	Subjective Significance	M	SEM	MIN	MAX
	Low Subjective Significance	-2.33	0.41	-8.88	4.23
	Medium Subjective Significance	-1.44	0.42	-8.35	5.41					Interaction between Valence:Subjective Significance	F(3.38, 152.02) = 4.70, p = .002, η^2_p = 0.09 Mauchly’s test (Xi2 (4) = 0.64, p = .022, Epsilon = 0.84)
	High Subjective Significance	-1.03	0.43	-8.32	4.69				Negative	Effect of Subjective Significance	F(2, 90) = 33.19, p < .001, η^2_p = 0.42
										Low Subjective Significance < High Subjective Significance	t(45) = -8.29, p < .001, d = -2.47
										Medium Subjective Significance < High Subjective Significance	t(45) = -3.36, p = .002, d = -1.00
	Valence : Arousal	M	SEM	MIN	MAX					Medium Subjective Significance > Low Subjective Significance	t(45) = 4.49, p < .001, d = 1.34
Neutral	Low Arousal	-2.04	0.43	-9.84	3.09				Neutral	Effect of Subjective Significance	F(2, 90) = 24.68, p < .001, η^2_p = 0.35
	Medium Arousal	-1.7	0.45	-8.63	3.44					Low Subjective Significance < High Subjective Significance	t(45) = -6.48, p < .001, d = -1.93
	High Arousal	-1.23	0.48	-8.78	5.94					Medium Subjective Significance > Low Subjective Significance	t(45) = 5.53, p < .001, d = 1.65
Medium Arousal	Negative	-1.22	0.43	-7.91	5.9				High Subjective Significance	Effect of Valence	F(1.72, 77.25) = 9.23, p = .001, η^2_p = 0.17 Mauchly’s test (Xi2 (2) = 0.83, p = .019, Epsilon = 0.86)
	Positive	-1.91	0.42	-8.95	4.65					Positive < Negative	t(45) = -5.06, p < .001, d = -1.51
							Three-way interaction between Valence:Arousal:Subjective Significance
	Valence : Subjective Significance	M	SEM	MIN	MAX					Three-way interaction between Valence:Arousal:Subjective Significance	F(8, 360) = 5.14, p < .001, η^2_p = 0.10
Negative	Low Subjective Significance	-2.32	0.41	-8.27	5.02				Negative	Interaction between Arousal:Subjective Significance	F(3.41, 153.39) = 4.45, p = .003, η^2_p = 0.09 Mauchly’s test (Xi2 (4) = 0.68, p = .050, Epsilon = 0.85)
	Medium Subjective Significance	-1.22	0.45	-8.26	5.9					Low Arousal:Low Subjective Significance < Low Arousal:High Subjective Significance	t(45) = -8.12, p < .001, d = -2.42
	High Subjective Significance	-0.6	0.42	-8.74	5.02					Low Arousal:Medium Subjective Significance < Low Arousal:High Subjective Significance	t(45) = -3.88, p = .009, d = -1.16
Neutral	Low Subjective Significance	-2.6	0.45	-10.45	1.94					Low Arousal:Medium Subjective Significance > Low Arousal:Low Subjective Significance	t(45) = 4.44, p = .002, d = 1.32
	Medium Subjective Significance	-1.4	0.44	-8.53	4.66					Medium Arousal:Low Subjective Significance < Medium Arousal:High Subjective Significance	t(45) = -4.19, p = .004, d = -1.25
	High Subjective Significance	-0.98	0.47	-8.14	5.45				Positive	Interaction between Arousal:Subjective Significance	F(4, 180) = 3.76, p = .006, η^2_p = 0.08
High Subjective Significance	Positive	-1.52	0.46	-10.66	3.7					High Arousal:Low Subjective Significance < High Arousal:High Subjective Significance	t(45) = -3.59, p = .030, d = -1.07
									Low Arousal	Interaction between Valence:Subjective Significance	F(4, 180) = 10.47, p < .001, η^2_p = 0.19
										Neutral:High Subjective Significance < Negative:High Subjective Significance	t(45) = -4.28, p = .003, d = -1.27
	Subjective Significance: Valence : Arousal	M	SEM	MIN	MAX					Neutral:Low Subjective Significance < Neutral:High Subjective Significance	t(45) = -3.39, p = .038, d = -1.01
Low Subjective Significance	Negative : Low Arousal	-2.85	0.45	-9.4	3.18					Positive:High Subjective Significance < Negative:High Subjective Significance	t(45) = -5.70, p < .001, d = -1.70
	Neutral : Low Arousal	-2.75	0.54	-12.1	2.5				Medium Subjective Significance	Interaction between Valence:Arousal	F(4, 180) = 5.65, p < .001, η^2_p = 0.11
	Positive : Low Arousal	-1.71	0.51	-12.32	10.33					Positive:Medium Arousal < Negative:Medium Arousal	t(45) = -4.09, p = .006, d = -1.22
	Negative : Medium Arousal	-2.19	0.45	-8.46	7.91
	Neutral : Medium Arousal	-2.65	0.46	-9.36	3.31
	Positive : Medium Arousal	-2.19	0.51	-11	4.15
	Negative : High Arousal	-1.92	0.47	-10.82	4.04
	Neutral : High Arousal	-2.39	0.47	-10.59	2.18
	Positive : High Arousal	-2.29	0.47	-9.35	5.44
Medium Subjective Significance	Negative : Low Arousal	-1.26	0.47	-7.27	7.41
	Neutral : Low Arousal	-1.82	0.46	-9.31	3.53
	Positive : Low Arousal	-1.24	0.46	-9.25	6.77
	Negative : Medium Arousal	-0.67	0.53	-8.25	6.7
	Neutral : Medium Arousal	-1.56	0.49	-9.34	3.98
	Positive : Medium Arousal	-2.24	0.43	-10.63	2.57
	Negative : High Arousal	-1.73	0.55	-9.69	6.52		Interaction between Arousal:Subjective Significance at Negative
	Neutral : High Arousal	-0.83	0.47	-7.57	6.46
	Positive : High Arousal	-1.64	0.56	-14.13	7.64
High Subjective Significance	Negative : Low Arousal	-0.08	0.48	-7.33	7.07
	Neutral : Low Arousal	-1.55	0.43	-8.36	4.3
	Positive : Low Arousal	-2.13	0.52	-11.13	3.99
	Negative : Medium Arousal	-0.79	0.47	-8.55	6.02
	Neutral : Medium Arousal	-0.9	0.51	-8.9	5.21
	Positive : Medium Arousal	-1.31	0.52	-10.06	7.23
	Negative : High Arousal	-0.91	0.45	-10.53	3.77
	Neutral : High Arousal	-0.48	0.61	-10.45	10.63
	Positive : High Arousal	-1.11	0.49	-12.52	4.36
							Interaction between Arousal:Subjective Significance at Positive
							Interaction between Valence:Subjective Significance at Low Arousal
							Interaction between Valence:Arousal at Medium Subjective Significance

## Sheet: LPC
	Valence	M	SEM	MIN	MAX		Bars show mean for a given combination of the factors, error bars mark SEM, dots represent values of individual subjects. Horizontal lines indicate significantly different pairs of conditions. (* p<.05, ** p<.01, ***p<.001)			Interaction between Valence:Arousal	F(3.17, 142.64) = 7.46, p < .001, η^2_p = 0.14 Mauchly’s test (Xi2 (4) = 0.63, p = .017, Epsilon = 0.79)
	Negative	1.51	0.35	-2.71	8.57				Neutral	Effect of Arousal	F(1.60, 72.11) = 30.72, p < .001, η^2_p = 0.41 Mauchly’s test (Xi2 (2) = 0.75, p = .002, Epsilon = 0.80)
	Neutral	1.34	0.33	-3.35	7.08					Low Arousal < High Arousal	t(45) = -6.94, p < .001, d = -2.07
	Positive	1.16	0.33	-3.48	6.96					Medium Arousal < High Arousal	t(45) = -7.20, p < .001, d = -2.15
										Medium Arousal > Low Arousal	t(45) = 2.32, p = .025, d = 0.69
									Positive	Effect of Arousal	F(2, 90) = 7.77, p = .001, η^2_p = 0.15
	Arousal	M	SEM	MIN	MAX					Medium Arousal < High Arousal	t(45) = -3.91, p = .001, d = -1.16
	Low Arousal	1.09	0.32	-2.21	7.69				Low Arousal	Effect of Valence	F(1.76, 79.29) = 7.10, p = .002, η^2_p = 0.14 Mauchly’s test (Xi2 (2) = 0.86, p = .041, Epsilon = 0.88)
	Medium Arousal	1.14	0.33	-3.64	6.75					Neutral < Negative	t(45) = -3.25, p = .007, d = -0.97
	High Arousal	1.79	0.36	-3.42	8.17				Medium Arousal	Effect of Valence	F(1.76, 79.05) = 4.48, p = .018, η^2_p = 0.09 Mauchly’s test (Xi2 (2) = 0.86, p = .038, Epsilon = 0.88)
										Positive < Negative	t(45) = -3.68, p = .002, d = -1.10
									High Arousal	Effect of Valence	F(2, 90) = 8.83, p < .001, η^2_p = 0.16
	Subjective Significance	M	SEM	MIN	MAX					Neutral > Negative	t(45) = 2.86, p = .013, d = 0.85
	Low Subjective Significance	0.86	0.32	-3.16	7.02					Positive < Neutral	t(45) = -4.68, p < .001, d = -1.40
	Medium Subjective Significance	1.45	0.36	-3.17	8.05
	High Subjective Significance	1.70	0.34	-2.94	7.54
										Interaction between Valence:Subjective Significance	F(4, 180) = 3.93, p = .004, η^2_p = 0.08
									Negative	Effect of Subjective Significance	F(2, 90) = 14.66, p < .001, η^2_p = 0.25
	Arousal:Valence	M	SEM	MIN	MAX					Low Subjective Significance < High Subjective Significance	t(45) = -4.81, p < .001, d = -1.43
Low Arousal	Negative	1.44	0.35	-2.62	8.60					Medium Subjective Significance > Low Subjective Significance	t(45) = 4.06, p < .001, d = 1.21
	Neutral	0.69	0.32	-2.89	7.01				Neutral	Effect of Subjective Significance	F(2, 90) = 20.54, p < .001, η^2_p = 0.31
	Positive	1.13	0.36	-2.64	7.46					Low Subjective Significance < High Subjective Significance	t(45) = -6.16, p < .001, d = -1.84
Medium Arousal	Negative	1.38	0.36	-3.51	8.05					Medium Subjective Significance > Low Subjective Significance	t(45) = 5.08, p < .001, d = 1.51
	Neutral	1.18	0.35	-3.86	6.41				High Subjective Significance	Effect of Valence	F(2, 90) = 6.95, p = .002, η^2_p = 0.13
	Positive	0.85	0.32	-3.54	6.66					Positive < Negative	t(45) = -3.55, p = .003, d = -1.06
High Arousal	Negative	1.72	0.40	-3.29	9.04					Positive < Neutral	t(45) = -2.62, p = .024, d = -0.78
	Neutral	2.16	0.37	-3.30	8.69
	Positive	1.48	0.36	-4.26	7.10		Three-way interaction between Valence:Arousal:Subjective Significance
										Three-way interaction between Valence:Arousal:Subjective Significance	F(8, 360) = 6.99, p < .001, η^2_p = 0.13
									Negative	Interaction between Arousal:Subjective Significance	F(4, 180) = 5.28, p < .001, η^2_p = 0.11
	Valence : Subjective Significance	M	SEM	MIN	MAX					Low Arousal:Low Subjective Significance < Low Arousal:High Subjective Significance	t(45) = -4.36, p = .002, d = -1.30
Negative	Low Subjective Significance	0.90	0.34	-3.66	8.20					Medium Arousal:Low Subjective Significance < High Arousal:Low Subjective Significance	t(45) = -3.78, p = .014, d = -1.13
	Medium Subjective Significance	1.67	0.41	-3.30	9.22					Medium Arousal:Low Subjective Significance < Medium Arousal:High Subjective Significance	t(45) = -3.57, p = .025, d = -1.06
	High Subjective Significance	1.97	0.36	-2.49	8.28					Medium Arousal:Medium Subjective Significance > Medium Arousal:Low Subjective Significance	t(45) = 4.60, p = .001, d = 1.37
Neutral	Low Subjective Significance	0.70	0.31	-2.54	6.06				Neutral	Interaction between Arousal:Subjective Significance	F(4, 180) = 4.55, p = .002, η^2_p = 0.09
	Medium Subjective Significance	1.48	0.36	-2.74	8.23					High Arousal:Medium Subjective Significance > High Arousal:Low Subjective Significance	t(45) = 5.00, p < .001, d = 1.49
	High Subjective Significance	1.84	0.36	-4.77	6.99					Low Arousal:High Subjective Significance < High Arousal:High Subjective Significance	t(45) = -3.25, p = .044, d = -0.97
Positive	High Subjective Significance	1.28	0.35	-3.08	7.38					Low Arousal:Low Subjective Significance < High Arousal:Low Subjective Significance	t(45) = -4.57, p = .001, d = -1.36
										Low Arousal:Low Subjective Significance < Low Arousal:High Subjective Significance	t(45) = -3.58, p = .019, d = -1.07
										Low Arousal:Medium Subjective Significance < High Arousal:Medium Subjective Significance	t(45) = -5.62, p < .001, d = -1.68
	Valence : Arousal : Subjective Significance	M	SEM	MIN	MAX					Low Arousal:Medium Subjective Significance > Low Arousal:Low Subjective Significance	t(45) = 3.31, p = .039, d = 0.99
Negative	Low Arousal : Low Subjective Significance	0.71	0.36	-3.36	8.27					Medium Arousal:Low Subjective Significance < Medium Arousal:High Subjective Significance	t(45) = -3.89, p = .008, d = -1.16
	Medium Arousal : Low Subjective Significance	0.44	0.38	-5.74	8.68					Medium Arousal:Medium Subjective Significance < High Arousal:Medium Subjective Significance	t(45) = -7.50, p < .001, d = -2.23
	High Arousal : Low Subjective Significance	1.55	0.43	-3.46	7.67					Medium Arousal:Medium Subjective Significance < Medium Arousal:High Subjective Significance	t(45) = -3.56, p = .019, d = -1.06
	Low Arousal : Medium Subjective Significance	1.34	0.42	-2.69	10.79				Positive	Interaction between Arousal:Subjective Significance	F(4, 180) = 3.88, p = .005, η^2_p = 0.08
	Medium Arousal : Medium Subjective Significance	2.10	0.47	-4.02	8.74					High Arousal:Low Subjective Significance < High Arousal:High Subjective Significance	t(45) = -3.86, p = .013, d = -1.15
	High Arousal : Medium Subjective Significance	1.57	0.45	-3.98	9.87					Low Arousal:High Subjective Significance < High Arousal:High Subjective Significance	t(45) = -3.74, p = .017, d = -1.12
	Low Arousal : High Subjective Significance	2.29	0.42	-3.01	10.52					Medium Arousal:High Subjective Significance < High Arousal:High Subjective Significance	t(45) = -3.65, p = .022, d = -1.09
	Medium Arousal : High Subjective Significance	1.58	0.37	-3.08	8.47				Low Arousal	Interaction between Valence:Subjective Significance	F(4, 180) = 4.17, p = .003, η^2_p = 0.08
	High Arousal : High Subjective Significance	2.05	0.42	-3.45	9.60					Positive:High Subjective Significance < Negative:High Subjective Significance	t(45) = -3.57, p = .027, d = -1.06
Neutral	Low Arousal : Low Subjective Significance	-0.03	0.37	-4.97	7.47				Medium Arousal	Interaction between Valence:Subjective Significance	F(4, 180) = 10.22, p < .001, η^2_p = 0.19
	Medium Arousal : Low Subjective Significance	0.73	0.39	-4.52	6.19					Neutral:Medium Subjective Significance < Negative:Medium Subjective Significance	t(45) = -3.99, p = .008, d = -1.19
	High Arousal : Low Subjective Significance	1.40	0.32	-3.22	6.74					Positive:High Subjective Significance < Neutral:High Subjective Significance	t(45) = -3.61, p = .022, d = -1.08
	Low Arousal : Medium Subjective Significance	0.92	0.35	-3.60	8.19					Positive:Medium Subjective Significance < Negative:Medium Subjective Significance	t(45) = -5.23, p < .001, d = -1.56
	Medium Arousal : Medium Subjective Significance	0.73	0.42	-3.71	7.15		Interaction between Arousal:Subjective Significance at Negative		High Arousal	Interaction between Valence:Subjective Significance	F(4, 180) = 3.48, p = .009, η^2_p = 0.07
	High Arousal : Medium Subjective Significance	2.79	0.43	-3.68	9.97					Neutral:Medium Subjective Significance > Negative:Medium Subjective Significance	t(45) = 3.73, p = .016, d = 1.11
	Low Arousal : High Subjective Significance	1.17	0.38	-4.69	5.99					Positive:Medium Subjective Significance < Neutral:Medium Subjective Significance	t(45) = -4.39, p = .002, d = -1.31
	Medium Arousal : High Subjective Significance	2.09	0.40	-5.87	8.69				High Subjective Significance	Interaction between Valence:Arousal	F(4, 180) = 5.63, p < .001, η^2_p = 0.11
	High Arousal : High Subjective Significance	2.27	0.45	-3.77	9.99					Neutral:Low Arousal < Negative:Low Arousal	t(45) = -3.32, p = .047, d = -0.99
Positive	Low Arousal : Low Subjective Significance	1.05	0.38	-3.51	8.90
	Medium Arousal : Low Subjective Significance	1.11	0.39	-6.40	6.46
	High Arousal : Low Subjective Significance	0.80	0.38	-5.07	5.21
	Low Arousal : Medium Subjective Significance	1.32	0.45	-3.33	12.68
	Medium Arousal : Medium Subjective Significance	0.65	0.36	-4.55	6.25
	High Arousal : Medium Subjective Significance	1.62	0.40	-5.84	8.38
	Low Arousal : High Subjective Significance	1.01	0.38	-3.71	7.10
	Medium Arousal : High Subjective Significance	0.79	0.36	-4.22	8.16
	High Arousal : High Subjective Significance	2.03	0.42	-3.53	8.77
							Interaction between Arousal:Subjective Significance at Neutral
							Interaction between Arousal:Subjective Significance at Positive
							Interaction between Valence:Subjective Significance at Low Arousal
							Interaction between Valence:Subjective Significance at Medium Arousal
							Interaction between Valence:Subjective Significance at High Arousal
							Interaction between Valence:Arousal at High Subjective Significance

## Sheet: Reaction Times
	Arousal	M	SEM	MIN	MAX			Interaction between Valence:Arousal	F(4, 180) = 3.67, p = .007, η^2_p = 0.08
	Low Arousal	977.02	48.46	509.88	2193.42		Neutral	Effect of Arousal	F(1.61, 72.44) = 10.75, p < .001, η^2_p = 0.19 Mauchly’s test (Xi2 (2) = 0.76, p = .002, Epsilon = 0.80)
	Medium Arousal	997.31	49.15	516.63	2130.29			Low Arousal < High Arousal	t(45) = -2.47, p = .035, d = -0.74
	High Arousal	985.6	46.97	520.21	2073.07			Medium Arousal > Low Arousal	t(45) = 6.14, p < .001, d = 1.83
							Low Arousal	Effect of Valence	F(2, 90) = 8.74, p < .001, η^2_p = 0.16
								Neutral < Negative	t(45) = -4.03, p = .001, d = -1.20
	Subjective Significance	M	SEM	MIN	MAX			Positive < Negative	t(45) = -2.71, p = .019, d = -0.81
	Low Subjective Significance	972.39	47.03	499.17	2049.69		Medium Arousal	Effect of Valence	F(2, 90) = 10.27, p < .001, η^2_p = 0.19
	Medium Subjective Significance	988.04	49.71	514.07	2228.77			Positive < Negative	t(45) = -4.18, p < .001, d = -1.25
	High Subjective Significance	999.5	47.92	533.48	2118.32			Positive < Neutral	t(45) = -3.25, p = .004, d = -0.97
							High Arousal	Effect of Valence	F(2, 90) = 3.35, p = .039, η^2_p = 0.07
	Valence	M	SEM	MIN	MAX			Positive < Negative	t(45) = -2.84, p = .020, d = -0.85
	Negative	997.35	46.81	520.08	1989.37
	Neutral	983.89	48.5	521.37	2242.43
	Positive	978.7	49.29	505.26	2164.98
	Valence : Arousal	M	SEM	MIN	MAX
Low Arousal	Negative	992.74	47.71	519.21	2058.42
	Neutral	963.84	48.34	501.64	2232.26
	Positive	974.48	50.46	508.79	2289.58
Medium Arousal	Negative	1004.98	46.72	530.75	1858.89
	Neutral	1005.24	51.66	521.84	2360.93
	Positive	981.7	50.11	497.31	2171.06
High Arousal	Negative	994.32	47.14	510.29	2050.81
	Neutral	982.58	46.48	527.34	2134.1
	Positive	979.9	48.35	495.67	2034.31

## Sheet: Emotionality Ratings
	Valence	M	SEM	MIN	MAX		Bars show mean for a given combination of the factors, error bars mark SEM, dots represent values of individual subjects. Horizontal lines indicate significantly different pairs of conditions. (* p<.05, ** p<.01, ***p<.001)									Interaction between Arousal:Subjective Significance	F(4, 180) = 5.19, p = .001, η^2_p = 0.10
	Negative	40.57	2.76	13.39	87.31										Low Arousal	Effect of Subjective Significance	F(1.63, 73.15) = 38.70, p < .001, η^2_p = 0.46 Mauchly’s test (Xi2 (2) = 0.77, p = .003, Epsilon = 0.81)
	Neutral	29.51	2.51	5.56	84.76											Low Subjective Significance < High Subjective Significance	t(45) = -6.88, p < .001, d = -2.05
	Positive	34.98	3.08	2.22	90.9											Medium Subjective Significance < High Subjective Significance	t(45) = -2.14, p = .038, d = -0.64
																Medium Subjective Significance > Low Subjective Significance	t(45) = 7.28, p < .001, d = 2.17
							Interaction between Arousal:Subjective Significance		Interaction between Valence:Arousal		Interaction between Valence:Subjective Significance		Three-way interaction between Valence:Arousal:Subjective Significance		Medium Arousal	Effect of Subjective Significance	F(1.27, 57.12) = 26.39, p < .001, η^2_p = 0.37 Mauchly’s test (Xi2 (2) = 0.42, p < .001, Epsilon = 0.63)
	Arousal	M	SEM	MIN	MAX											Low Subjective Significance < High Subjective Significance	t(45) = -5.65, p < .001, d = -1.69
	Low Arousal	27.54	2.57	4.81	83.57											Medium Subjective Significance < High Subjective Significance	t(45) = -4.41, p < .001, d = -1.31
	Medium Arousal	33.17	2.66	5.83	86.88											Medium Subjective Significance > Low Subjective Significance	t(45) = 4.68, p < .001, d = 1.39
	High Arousal	44.34	2.94	11.48	92.51										High Arousal	Effect of Subjective Significance	F(1.43, 64.55) = 39.94, p < .001, η^2_p = 0.47 Mauchly’s test (Xi2 (2) = 0.61, p < .001, Epsilon = 0.72)
																Low Subjective Significance < High Subjective Significance	t(45) = -6.94, p < .001, d = -2.07
																Medium Subjective Significance < High Subjective Significance	t(45) = -3.02, p = .004, d = -0.90
	Subjective Significance	M	SEM	MIN	MAX											Medium Subjective Significance > Low Subjective Significance	t(45) = 8.17, p < .001, d = 2.44
	Low Subjective Significance	28.03	2.75	4.22	85.08
	Medium Subjective Significance	35.93	2.71	8.52	87.99											Interaction between Subjective Significance:Arousal	F(4, 180) = 5.19, p = .001, η^2_p = 0.10
	High Subjective Significance	41.09	2.75	8.15	89.89										Low Subjective Significance	Effect of Arousal	F(1.38, 61.88) = 43.05, p < .001, η^2_p = 0.49 Mauchly’s test (Xi2 (2) = 0.55, p < .001, Epsilon = 0.69)
																Low Arousal < High Arousal	t(45) = -7.16, p < .001, d = -2.13
																Medium Arousal < High Arousal	t(45) = -6.14, p < .001, d = -1.83
	Subjective Significance : Arousal	M	SEM	MIN	MAX											Medium Arousal > Low Arousal	t(45) = 5.18, p < .001, d = 1.54
Low Subjective Significance	Low Arousal	20.7	2.62	1.11	80.56										Medium Subjective Significance	Effect of Arousal	F(1.63, 73.20) = 64.75, p < .001, η^2_p = 0.59 Mauchly’s test (Xi2 (2) = 0.77, p = .003, Epsilon = 0.81)
	Medium Arousal	29.72	2.73	6.67	87.7											Low Arousal < High Arousal	t(45) = -8.75, p < .001, d = -2.61
	High Arousal	32.21	2.71	5.91	85.24											Medium Arousal < High Arousal	t(45) = -9.29, p < .001, d = -2.77
Medium Subjective Significance	Low Arousal	27.38	2.83	0	86.36										High Subjective Significance	Effect of Arousal	F(1.55, 69.77) = 83.26, p < .001, η^2_p = 0.65 Mauchly’s test (Xi2 (2) = 0.71, p = .001, Epsilon = 0.78)
	Medium Arousal	31.98	2.7	7.78	86.51											Low Arousal < High Arousal	t(45) = -10.57, p < .001, d = -3.15
	High Arousal	40.16	3	5.56	87.78											Medium Arousal < High Arousal	t(45) = -7.50, p < .001, d = -2.24
High Subjective Significance	Low Arousal	36.02	3.25	7.89	91.11											Medium Arousal > Low Arousal	t(45) = 7.37, p < .001, d = 2.20
	Medium Arousal	46.09	3.12	11.11	90.96
	High Arousal	50.91	2.91	12.22	96.67											Interaction between Valence:Arousal	F(3.00, 134.94) = 20.57, p < .001, η^2_p = 0.31 Mauchly’s test (Xi2 (4) = 0.54, p = .002, Epsilon = 0.75)
															Negative	Effect of Arousal	F(1.50, 67.39) = 27.62, p < .001, η^2_p = 0.38 Mauchly’s test (Xi2 (2) = 0.66, p < .001, Epsilon = 0.75)
																Low Arousal < High Arousal	t(45) = -5.90, p < .001, d = -1.76
	Valence : Arousal	M	SEM	MIN	MAX											Medium Arousal < High Arousal	t(45) = -4.97, p < .001, d = -1.48
Negative	Low Arousal	35.31	2.57	7.97	81.11											Medium Arousal > Low Arousal	t(45) = 3.85, p < .001, d = 1.15
	Medium Arousal	40.17	2.89	11.7	86.36		Effect of Subjective Significance at Low Arousal		Effect of Arousal at Negative		Effect of Subjective Significance at Negative		Interaction between Arousal:Subjective Significance at Negative		Neutral	Effect of Arousal	F(1.23, 55.56) = 91.23, p < .001, η^2_p = 0.67 Mauchly’s test (Xi2 (2) = 0.38, p < .001, Epsilon = 0.62)
	High Arousal	46.22	3.19	17.45	94.44											Low Arousal < High Arousal	t(45) = -10.08, p < .001, d = -3.00
Neutral	Low Arousal	18.05	2.46	1.11	77.78											Medium Arousal < High Arousal	t(45) = -9.33, p < .001, d = -2.78
	Medium Arousal	27.93	2.65	3.57	84.44											Medium Arousal > Low Arousal	t(45) = 7.74, p < .001, d = 2.31
	High Arousal	42.56	3.04	10	92.22										Positive	Effect of Arousal	F(2, 90) = 64.92, p < .001, η^2_p = 0.59
Positive	Low Arousal	29.27	3.33	1.11	91.83											Low Arousal < High Arousal	t(45) = -9.72, p < .001, d = -2.90
	Medium Arousal	31.42	3.14	2.22	90											Medium Arousal < High Arousal	t(45) = -8.99, p < .001, d = -2.68
	High Arousal	44.24	3.09	3.33	90.87										Low Arousal	Effect of Valence	F(2, 90) = 39.31, p < .001, η^2_p = 0.47
																Neutral < Negative	t(45) = -9.51, p < .001, d = -2.83
																Positive < Negative	t(45) = -2.67, p = .010, d = -0.80
	Valence : Subjective Significance	M	SEM	MIN	MAX											Positive > Neutral	t(45) = 6.17, p < .001, d = 1.84
Negative	Low Subjective Significance	31.7	2.76	5.71	79.85										Medium Arousal	Effect of Valence	F(1.25, 56.21) = 19.74, p < .001, η^2_p = 0.30 Mauchly’s test (Xi2 (2) = 0.40, p < .001, Epsilon = 0.62)
	Medium Subjective Significance	40.48	3.04	12.41	90.96											Neutral < Negative	t(45) = -7.64, p < .001, d = -2.28
	High Subjective Significance	49.51	3.01	14.15	91.11											Positive < Negative	t(45) = -3.27, p = .004, d = -0.98
Neutral	Low Subjective Significance	22.89	2.64	2.3	84.29											Positive > Neutral	t(45) = 2.27, p = .028, d = 0.68
	Medium Subjective Significance	30.33	2.65	4.44	82.99
	High Subjective Significance	35.32	2.81	4.44	88.89
Positive	Low Subjective Significance	29.51	3.31	1.11	91.11											Interaction between Valence:Subjective Significance	F(4, 180) = 8.19, p < .001, η^2_p = 0.15
	Medium Subjective Significance	36.97	3.23	2.22	91.91										Negative	Effect of Subjective Significance	F(1.52, 68.59) = 52.48, p < .001, η^2_p = 0.54 Mauchly’s test (Xi2 (2) = 0.69, p < .001, Epsilon = 0.76)
	High Subjective Significance	38.45	3.08	3.33	89.68											Low Subjective Significance < High Subjective Significance	t(45) = -8.39, p < .001, d = -2.50
																Medium Subjective Significance < High Subjective Significance	t(45) = -5.24, p < .001, d = -1.56
																Medium Subjective Significance > Low Subjective Significance	t(45) = 6.97, p < .001, d = 2.08
	Valence : Arousal : Subjective Significance	M	SEM	MIN	MAX										Neutral	Effect of Subjective Significance	F(1.55, 69.95) = 27.24, p < .001, η^2_p = 0.38 Mauchly’s test (Xi2 (2) = 0.71, p = .001, Epsilon = 0.78)
Negative	Low Arousal : Low Subjective Significance	23.82	2.42	3.33	75											Low Subjective Significance < High Subjective Significance	t(45) = -5.94, p < .001, d = -1.77
	Medium Arousal : Low Subjective Significance	33.04	3.23	0	86.21											Medium Subjective Significance < High Subjective Significance	t(45) = -3.24, p = .002, d = -0.97
	High Arousal : Low Subjective Significance	38.25	3.46	3.45	86.67											Medium Subjective Significance > Low Subjective Significance	t(45) = 5.45, p < .001, d = 1.62
	Low Arousal : Medium Subjective Significance	33.45	2.98	3.45	90										Positive	Effect of Subjective Significance	F(1.51, 67.91) = 19.20, p < .001, η^2_p = 0.30 Mauchly’s test (Xi2 (2) = 0.67, p < .001, Epsilon = 0.75)
	Medium Arousal : Medium Subjective Significance	43.65	3.25	10.34	96.55											Low Subjective Significance < High Subjective Significance	t(45) = -4.76, p < .001, d = -1.42
	High Arousal : Medium Subjective Significance	44.36	3.55	0	96.67											Medium Subjective Significance > Low Subjective Significance	t(45) = 6.89, p < .001, d = 2.06
	Low Arousal : High Subjective Significance	48.66	3.25	6.9	93.33		Effect of Subjective Significance at Medium Arousal		Effect of Arousal at Neutral		Effect of Subjective Significance at Neutral		Interaction between Arousal:Subjective Significance at Neutral		Low Subjective Significance	Effect of Valence	F(1.43, 64.48) = 14.94, p < .001, η^2_p = 0.25 Mauchly’s test (Xi2 (2) = 0.60, p < .001, Epsilon = 0.72)
	Medium Arousal : High Subjective Significance	43.83	3.27	7.14	86.67											Neutral < Negative	t(45) = -7.54, p < .001, d = -2.25
	High Arousal : High Subjective Significance	56.05	3.37	16.67	100											Positive > Neutral	t(45) = 4.06, p < .001, d = 1.21
Neutral	Low Arousal : Low Subjective Significance	14.4	2.49	0	83.33										Medium Subjective Significance	Effect of Valence	F(1.44, 64.93) = 11.61, p < .001, η^2_p = 0.21 Mauchly’s test (Xi2 (2) = 0.61, p < .001, Epsilon = 0.72)
	Medium Arousal : Low Subjective Significance	20.76	2.99	0	86.21											Neutral < Negative	t(45) = -6.24, p < .001, d = -1.86
	High Arousal : Low Subjective Significance	33.5	3.39	0	96.67											Positive > Neutral	t(45) = 3.44, p = .003, d = 1.02
	Low Arousal : Medium Subjective Significance	21.83	2.59	3.33	80										High Subjective Significance	Effect of Valence	F(1.61, 72.47) = 30.14, p < .001, η^2_p = 0.40 Mauchly’s test (Xi2 (2) = 0.76, p = .002, Epsilon = 0.81)
	Medium Arousal : Medium Subjective Significance	22.73	2.87	0	90											Neutral < Negative	t(45) = -7.05, p < .001, d = -2.10
	High Arousal : Medium Subjective Significance	46.42	3.39	6.67	96.55											Positive < Negative	t(45) = -4.93, p < .001, d = -1.47
	Low Arousal : High Subjective Significance	17.93	2.91	0	83.33											Positive > Neutral	t(45) = 2.23, p = .031, d = 0.66
	Medium Arousal : High Subjective Significance	40.3	3.36	0	86.67
	High Arousal : High Subjective Significance	47.75	3.1	10	96.67
Positive	Low Arousal : Low Subjective Significance	23.88	3.6	0	96.67											Three-way interaction between Valence:Arousal:Subjective Significance	F(6.39, 287.68) = 14.31, p < .001, η^2_p = 0.24 Mauchly’s test (Xi2 (8) = 0.29, p = .034, Epsilon = 0.80)
	Medium Arousal : Low Subjective Significance	28.36	3.29	0	86.67										Negative	Interaction between Arousal:Subjective Significance	F(4, 180) = 9.07, p < .001, η^2_p = 0.17
	High Arousal : Low Subjective Significance	36.3	3.77	3.33	96.67											High Arousal:Low Subjective Significance < High Arousal:High Subjective Significance	t(45) = -7.23, p < .001, d = -2.16
	Low Arousal : Medium Subjective Significance	33.88	3.81	0	96.67											High Arousal:Medium Subjective Significance < High Arousal:High Subjective Significance	t(45) = -5.00, p < .001, d = -1.49
	Medium Arousal : Medium Subjective Significance	29.56	3.44	0	93.33											Low Arousal:Low Subjective Significance < High Arousal:Low Subjective Significance	t(45) = -5.32, p < .001, d = -1.59
	High Arousal : Medium Subjective Significance	47.48	3.27	3.33	89.29											Low Arousal:Low Subjective Significance < Low Arousal:High Subjective Significance	t(45) = -8.97, p < .001, d = -2.67
	Low Arousal : High Subjective Significance	30.05	3.03	0	86.67											Low Arousal:Medium Subjective Significance < High Arousal:Medium Subjective Significance	t(45) = -5.32, p < .001, d = -1.59
	Medium Arousal : High Subjective Significance	36.34	3.52	0	93.1											Low Arousal:Medium Subjective Significance < Low Arousal:High Subjective Significance	t(45) = -6.99, p < .001, d = -2.08
	High Arousal : High Subjective Significance	48.95	3.19	3.33	93.33											Low Arousal:Medium Subjective Significance > Low Arousal:Low Subjective Significance	t(45) = 4.67, p < .001, d = 1.39
																Medium Arousal:High Subjective Significance < High Arousal:High Subjective Significance	t(45) = -5.03, p < .001, d = -1.50
																Medium Arousal:Low Subjective Significance > Low Arousal:Low Subjective Significance	t(45) = 4.35, p = .001, d = 1.30
																Medium Arousal:Low Subjective Significance < Medium Arousal:High Subjective Significance	t(45) = -3.65, p = .010, d = -1.09
																Medium Arousal:Medium Subjective Significance > Low Arousal:Medium Subjective Significance	t(45) = 5.41, p < .001, d = 1.61
																Medium Arousal:Medium Subjective Significance > Medium Arousal:Low Subjective Significance	t(45) = 4.95, p < .001, d = 1.48
															Neutral	Interaction between Arousal:Subjective Significance	F(4, 180) = 21.12, p < .001, η^2_p = 0.32
																High Arousal:Low Subjective Significance < High Arousal:High Subjective Significance	t(45) = -6.20, p < .001, d = -1.85
																High Arousal:Medium Subjective Significance > High Arousal:Low Subjective Significance	t(45) = 6.01, p < .001, d = 1.79
							Effect of Subjective Significance at High Arousal		Effect of Arousal at Positive		Effect of Subjective Significance at Positive		Interaction between Arousal:Subjective Significance at Positive			Low Arousal:High Subjective Significance < High Arousal:High Subjective Significance	t(45) = -10.92, p < .001, d = -3.26
																Low Arousal:Low Subjective Significance < High Arousal:Low Subjective Significance	t(45) = -6.44, p < .001, d = -1.92
																Low Arousal:Medium Subjective Significance < High Arousal:Medium Subjective Significance	t(45) = -8.66, p < .001, d = -2.58
																Low Arousal:Medium Subjective Significance > Low Arousal:Low Subjective Significance	t(45) = 4.13, p = .002, d = 1.23
																Medium Arousal:High Subjective Significance < High Arousal:High Subjective Significance	t(45) = -3.20, p = .030, d = -0.96
																Medium Arousal:High Subjective Significance > Low Arousal:High Subjective Significance	t(45) = 10.59, p < .001, d = 3.16
																Medium Arousal:Low Subjective Significance < High Arousal:Low Subjective Significance	t(45) = -6.44, p < .001, d = -1.92
																Medium Arousal:Low Subjective Significance > Low Arousal:Low Subjective Significance	t(45) = 3.00, p = .048, d = 0.90
																Medium Arousal:Low Subjective Significance < Medium Arousal:High Subjective Significance	t(45) = -6.11, p < .001, d = -1.82
																Medium Arousal:Medium Subjective Significance < High Arousal:Medium Subjective Significance	t(45) = -10.80, p < .001, d = -3.22
																Medium Arousal:Medium Subjective Significance < Medium Arousal:High Subjective Significance	t(45) = -6.12, p < .001, d = -1.83
															Positive	Interaction between Arousal:Subjective Significance	F(4, 180) = 5.60, p < .001, η^2_p = 0.11
																High Arousal:Low Subjective Significance < High Arousal:High Subjective Significance	t(45) = -4.15, p = .003, d = -1.24
																High Arousal:Medium Subjective Significance > High Arousal:Low Subjective Significance	t(45) = 5.12, p < .001, d = 1.53
																Low Arousal:High Subjective Significance < High Arousal:High Subjective Significance	t(45) = -10.65, p < .001, d = -3.18
																Low Arousal:Low Subjective Significance < High Arousal:Low Subjective Significance	t(45) = -5.26, p < .001, d = -1.57
																Low Arousal:Low Subjective Significance < Low Arousal:High Subjective Significance	t(45) = -3.39, p = .025, d = -1.01
																Low Arousal:Medium Subjective Significance < High Arousal:Medium Subjective Significance	t(45) = -5.46, p < .001, d = -1.63
																Low Arousal:Medium Subjective Significance > Low Arousal:Low Subjective Significance	t(45) = 6.09, p < .001, d = 1.81
																Medium Arousal:High Subjective Significance < High Arousal:High Subjective Significance	t(45) = -6.64, p < .001, d = -1.98
																Medium Arousal:High Subjective Significance > Low Arousal:High Subjective Significance	t(45) = 3.67, p = .012, d = 1.10
																Medium Arousal:Low Subjective Significance < High Arousal:Low Subjective Significance	t(45) = -3.51, p = .019, d = -1.05
																Medium Arousal:Medium Subjective Significance < High Arousal:Medium Subjective Significance	t(45) = -7.21, p < .001, d = -2.15
															Low Arousal	Interaction between Valence:Subjective Significance	F(4, 180) = 25.92, p < .001, η^2_p = 0.37
																Neutral:High Subjective Significance < Negative:High Subjective Significance	t(45) = -10.74, p < .001, d = -3.20
																Neutral:Low Subjective Significance < Negative:Low Subjective Significance	t(45) = -5.26, p < .001, d = -1.57
																Neutral:Medium Subjective Significance < Negative:Medium Subjective Significance	t(45) = -5.19, p < .001, d = -1.55
																Positive:High Subjective Significance < Negative:High Subjective Significance	t(45) = -7.37, p < .001, d = -2.20
																Positive:High Subjective Significance > Neutral:High Subjective Significance	t(45) = 6.17, p < .001, d = 1.84
							Effect of Arousal at Low Subjective Significance		Effect of Valence at Low Arousal		Effect of Valence at Low Subjective Significance		Interaction between Valence:Subjective Significance at Low Arousal			Positive:Low Subjective Significance > Neutral:Low Subjective Significance	t(45) = 4.02, p = .004, d = 1.20
																Positive:Medium Subjective Significance > Neutral:Medium Subjective Significance	t(45) = 4.34, p = .001, d = 1.29
															Medium Arousal	Interaction between Valence:Subjective Significance	F(4, 180) = 9.40, p < .001, η^2_p = 0.17
																Neutral:Low Subjective Significance < Negative:Low Subjective Significance	t(45) = -5.71, p < .001, d = -1.70
																Neutral:Medium Subjective Significance < Negative:Medium Subjective Significance	t(45) = -8.34, p < .001, d = -2.49
																Positive:Low Subjective Significance > Neutral:Low Subjective Significance	t(45) = 3.29, p = .033, d = 0.98
																Positive:Medium Subjective Significance < Negative:Medium Subjective Significance	t(45) = -3.86, p = .008, d = -1.15
															High Arousal	Interaction between Valence:Subjective Significance	F(4, 180) = 4.48, p = .002, η^2_p = 0.09
																Neutral:High Subjective Significance < Negative:High Subjective Significance	t(45) = -3.58, p = .017, d = -1.07
							Effect of Arousal at Medium Subjective Significance		Effect of Valence at Medium Arousal		Effect of Valence at Medium Subjective Significance		Interaction between Valence:Subjective Significance at Medium Arousal
							Effect of Arousal at High Subjective Significance				Effect of Valence at High Subjective Significance		Interaction between Valence:Subjective Significance at High Arousal
